# Supplementary material for: Midblock sulfonation of a model long-chain poly(p-tert-butylstyrene-b-styrene-b-p-tert-butylstyrene) triblock copolymer
Source: Royal Society of Chemistry journal article supplement (doi:10.1039/c2jm35504c), 2012-01-01
Supplement: c2jm35504c.pdf [file c2jm35504c.pdf]

## SUPPLEMENTAL INFORMATION

Refractive index elution results determined by SEC in the molecular weight analysis of the copolymer and homopolymer employed in this study are provided in Fig. S1.

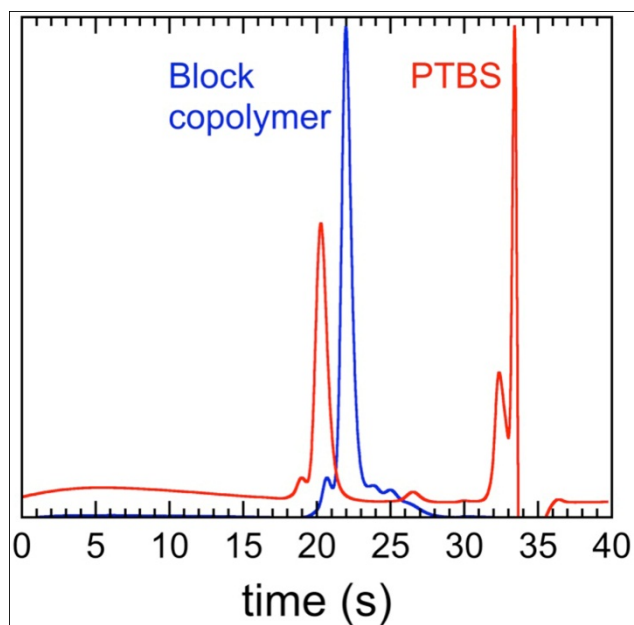

**Figure S1.** Refractive index (arbitrary units) elution results acquired from the block copolymer and PTBS homopolymer described in the text.
